# Supplementary material for: Diabetes-Related Complications and Mortality in Patients With Young-Onset Latent Autoimmune Diabetes: A 14-Year Analysis of the Prospective Hong Kong Diabetes Register
Source: Oxford University Press journal article supplement (doi:10.2337/dc18-1796), 2019-04-09

SUPPLEMENTARY DATA

**Supplementary Figure S1.** Proportion of patients with positive anti-GAD antibodies by enrolment period

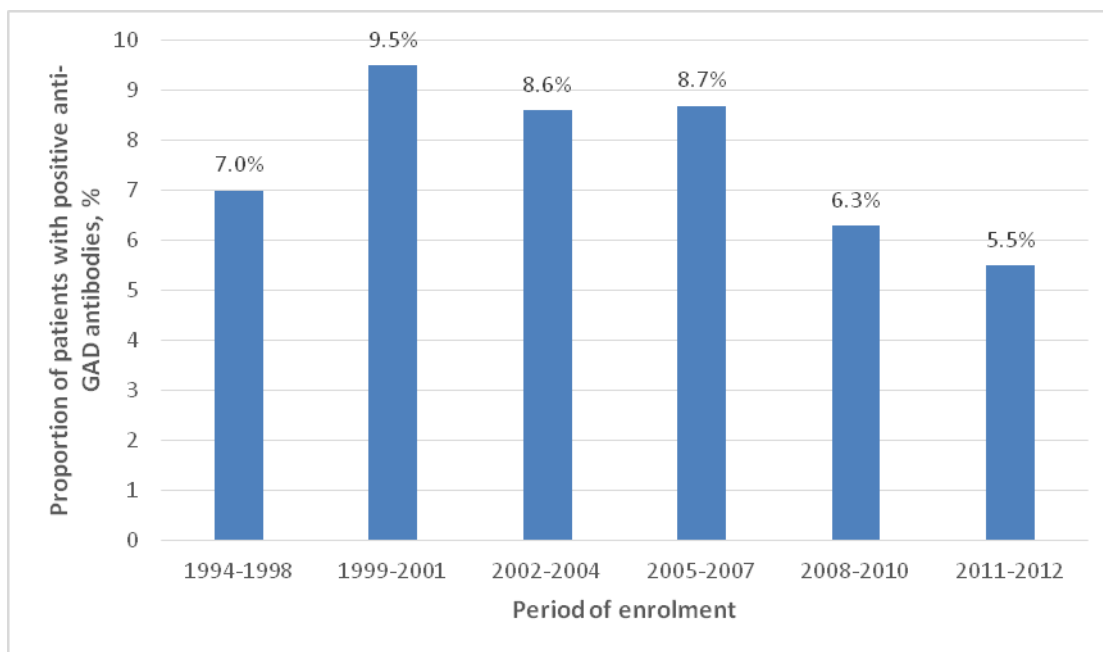

Supplement: dc181796supplementarydata.pdf [file dc181796supplementarydata.pdf]
